# Supplementary material
Source: publisher figshare collection journal article supplement (https://sage.figshare.com/ndownloader/files/39664597)
Supplement: Supplementary file 1 [file 39664597]

## Appendix A. Maximum Priority Index

The Priority Index (PI) is given by:  $PI_j = I_j \prod_{k=1}^K (w_k f_k)^{c_{jk}}$ , where  $I_j$  is the Fisher's information of item model  $j$  at the relevant  $\theta$ ,  $w_k$  is the weight associated with  $k$ th constraint, and  $f_k$  is the scaled quota left of constraint  $k$ .  $c_{jk}$  is the element in the  $j$ th row and  $k$ th column of the constraint relevancy matrix  $C$ .  $c_{jk} = 1$  means constraint  $k$  is relevant to item model  $j$ , and  $c_{jk} = 0$  means constraint  $k$  is irrelevant to item model  $j$ . For the scaled quota left  $f_k$ , if the  $k$ th constraint is a content constraint, then  $f_k = (X_k - x_k)/X_k$ , where  $X_k$  is the total number of item models from a certain content area, and  $x_k$  indicates that so far,  $x_k$  such item models have been selected. If the  $k$ th constraint is an exposure rate constraint, then  $f_k = (r - (n/N))/r$ , where  $r$  is the pre-set maximum value of an acceptable exposure rate,  $n$  is the number of the examinees who have seen instances from item model  $j$ , and  $N$  is the number of the examinees who have taken the test. The maximum exposure rate of an item model is constrained to be no greater than 20%, and the constructed individualized tests are constrained to have an equal number of items from each content domain.

Cheng, Y., & Chang, H. H. (2009). The maximum priority index method for severely constrained item selection in computerized adaptive testing. *British Journal of Mathematical and Statistical Psychology*, 62(2), 369-383.
